# Supplementary material
Source: Royal Society of Chemistry journal article supplement (doi:10.1039/d6cp01034b)
Supplement: d6cp01034b1.pdf [file d6cp01034b1.pdf]

## Deciphering the hydrophilic behavior and vibrational characteristics of $\theta$ -Al<sub>2</sub>O<sub>3</sub> (010) surface

Wanxiang Yang<sup>a</sup>, Mei Zheng<sup>a,b\*</sup>, Wei Lin<sup>a,c\*</sup>

<sup>a</sup>State Key Laboratory of Photocatalysis on Energy and Environment, College of Chemistry, Fuzhou University, Fuzhou 350108, China

<sup>b</sup>School of Materials Science & Engineering, Nanyang Technological University, Singapore 639798, Singapore

<sup>c</sup>Fujian Provincial Key Laboratory of Theoretical and Computational Chemistry, Xiamen University, Xiamen, 361005, China

Email: mei.zheng@ntu.edu.sg; [wlin@fzu.edu.cn](mailto:wlin@fzu.edu.cn)

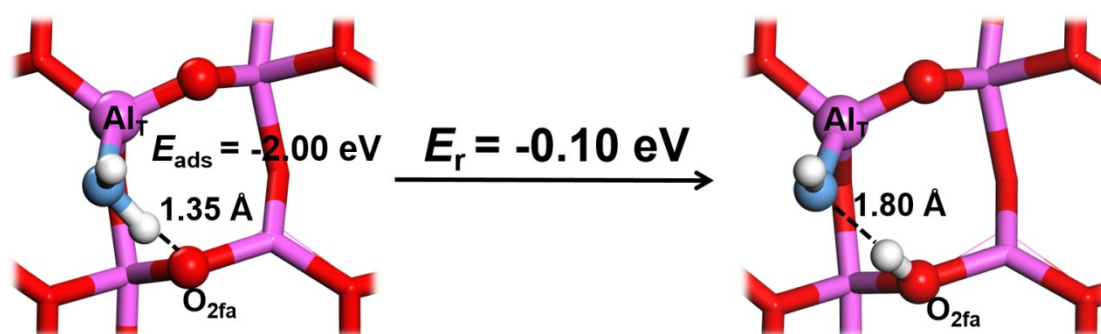

Fig. S1. Potential energy diagram for H<sub>2</sub>O decomposition on Al<sub>T</sub> site by pure  $\theta$ -Al<sub>2</sub>O<sub>3</sub>(010)

(\*H<sub>2</sub>O → \*OH + \*H).

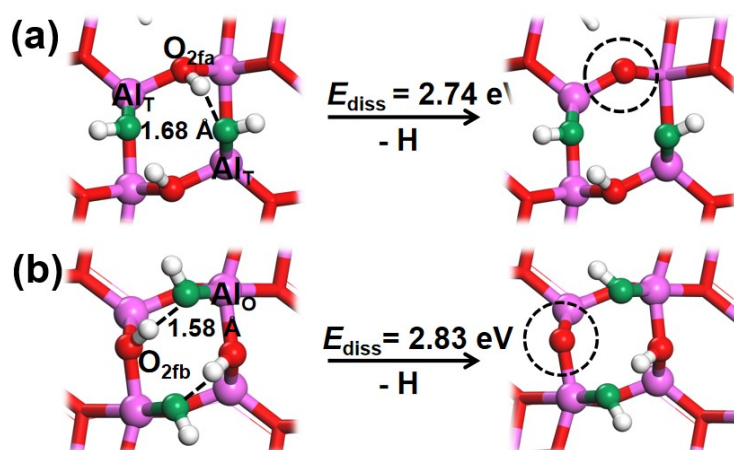

Fig. S2. The bridged H is dissociated from (a)  $O_{2fa}$  and (b)  $O_{2fb}$  atom.

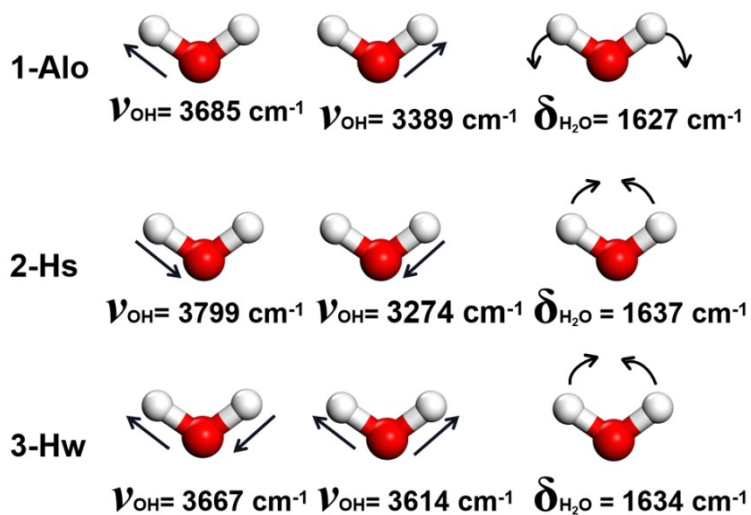

Fig. S3. (a)  $H_2O$  possible adsorption sites on hydroxylated  $\theta-Al_2O_3$  (010). (b) Vibrational frequencies of  $H_2O$  adsorption on the hydroxylated  $\theta-Al_2O_3$  (010).

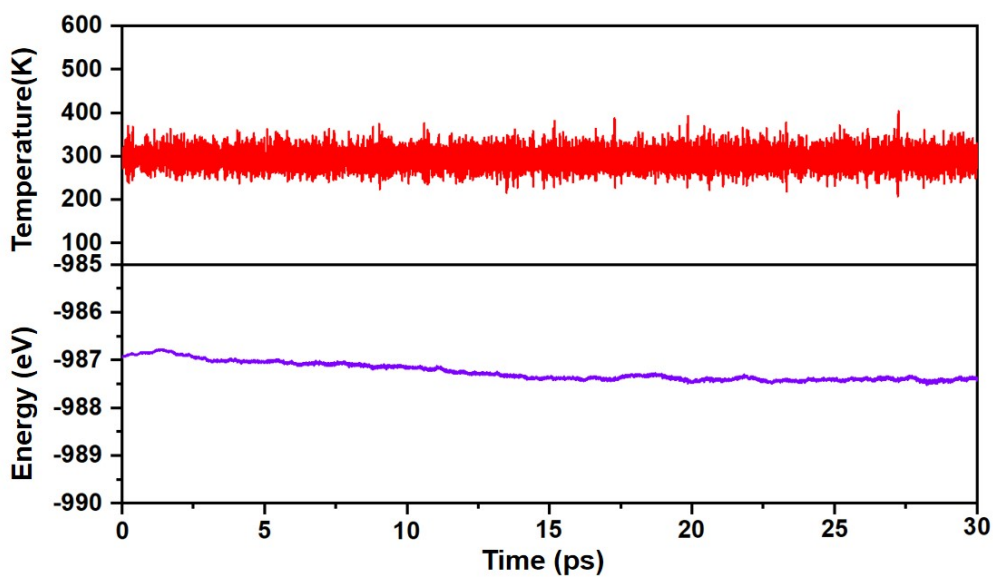

Fig. S4. The relationship between temperature and energy with time for 30 ps simulations in the microcanonical (NVT) ensemble at 300 K.

Table S1. Comparison of Vibrational Frequencies of OHs on the  $\text{H}_2\text{O}/\theta\text{-Al}_2\text{O}_3(010)$ .

| H-O-H<br>bending vibration<br>(OHs of water)                                        |                       |                       | H-O-H<br>stretching vibration<br>(OHs of water)                                                  |                                                                                                  |
|-------------------------------------------------------------------------------------|-----------------------|-----------------------|--------------------------------------------------------------------------------------------------|--------------------------------------------------------------------------------------------------|
| Harmonic vibration                                                                  |                       | MD-VDOS               | Harmonic vibration                                                                               | MD-VDOS                                                                                          |
| 1620 $\text{cm}^{-1}$                                                               | 1636 $\text{cm}^{-1}$ | 1628 $\text{cm}^{-1}$ | 3177 $\text{cm}^{-1}$<br>3284 $\text{cm}^{-1}$<br>3472 $\text{cm}^{-1}$<br>3520 $\text{cm}^{-1}$ | 3160 $\text{cm}^{-1}$<br>3261 $\text{cm}^{-1}$<br>3446 $\text{cm}^{-1}$<br>3510 $\text{cm}^{-1}$ |
| 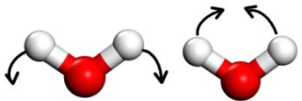 |                       |                       |              |                                                                                                  |
| H-O-H...O<br>stretching vibration<br>H bonded OHs                                   |                       |                       | Free (dangling) OHs<br>stretching vibration                                                      |                                                                                                  |
| Harmonic vibration                                                                  |                       | MD-VDOS               | Harmonic vibration                                                                               | MD-VDOS                                                                                          |
| 3624 $\text{cm}^{-1}$                                                               |                       | 3610 $\text{cm}^{-1}$ | 3719 $\text{cm}^{-1}$                                                                            | 3742 $\text{cm}^{-1}$                                                                            |
|  |                       |                       |              |                                                                                                  |

Table S2 Comparison of calculated and experimental vibrational frequencies.

|                                              | Cal. (cm <sup>-1</sup> ) | Exp. (cm <sup>-1</sup> )*                                     |
|----------------------------------------------|--------------------------|---------------------------------------------------------------|
| H-O-H<br>bending vibration<br>(OHs of water) | 1628                     | 1648 <sup>1</sup><br>1642 <sup>2</sup><br>1637 <sup>3,4</sup> |
| O-H<br>stretching vibration                  | 3322                     | 3319 <sup>2</sup>                                             |
|                                              | 3350                     | 3500 <sup>5</sup><br>3499 <sup>1</sup>                        |

\* The experimental vibrational frequencies are obtained from Refs. 1-5.

## References

- 1 W. Lin, W. Wu, E. Weitz and G. C. Schatz, *J. Phys. Chem. C*, 2019, **123**, 27704–27711.
- 2 H. A. Al-Abadleh and V. H. Grassian, *Langmuir*, 2003, **19**, 341–347.
- 3 M. Takeuchi, R. Kurosawa and J. Ryu, *J. Raman Spectrosc.*, 2022, **53**, 1793–1804.
- 4 M. Takeuchi, L. Bertinetti, G. Martra, S. Coluccia and M. Anpo, *Appl. Catal. Gen.*, 2006, **307**, 13–20.
- 5 C. Dyer, P. J. Hendra, W. Forsling and M. Ranheimer, *Spectrochim. Acta Part Mol. Spectrosc.*, 1993, **49**, 691–705.
